# Supplementary material for: Associated factors of pelvic organ prolapse among patients at Public Hospitals of Southern Ethiopia: A case-control study design
Source: PubMed Central journal article supplement (PMC9847956; doi:10.1371/journal.pone.0278461), 2023-01-18
Supplement: pone.0278461.s001.pdf [file pone.0278461.s001.pdf]

# Supporting information

## S1 File: Confidentiality and informed consent statement

My name is \_\_\_\_\_ I am from \_\_\_\_\_. I am part of a team of people who are carrying out study on *predictors of pelvic organ prolapse and reasons associated with delayed treatments among patients at selected referral and general hospitals of Southern Ethiopia* by Asfaw Borsamo who is attending his Master's degree in Human Anatomy at University of Gondar. I brought these questions to you in order to find out conditions regarding to youth friendly service utilization and associated factors among preparatory school students in North Shewa zone. The questionnaire will take about 30-40 minutes to fill. The purpose of this study is to get more information on factors contributing to pelvic organ prolapse and reasons for delayed treatments. Therefore, your honest and genuine involvement by responding to the questions prepared is highly appreciated and helpful to attain the objective of the study. Your name will not be written on this form and no individual response will be reported to anybody. Hence, your answers are completely confidential. If you do not have answer for any question or you do not want to respond, you can withdraw the interview at any time. I would greatly appreciate your help in participating in this study. Would you be willing to participate?

If yes, let us proceed by signing this document.

If no, thank you and stop here.

Participant's signature \_\_\_\_\_ Date \_\_\_\_\_

Data collector's signature \_\_\_\_\_ Date \_\_\_\_\_

## S2 File: English version data collection checklist

This interviewer-guided questionnaire was developed aiming to assess factor associated with pelvic organ prolapse and reasons associated with delayed treatments.

Ref. No \_\_\_\_\_

| S.No                                         | <b>Part one: Objective findings</b> |         |
|----------------------------------------------|-------------------------------------|---------|
| 1                                            | Is there POP?                       | Yes     |
|                                              |                                     | No      |
| 2                                            | If yes, what is stages of POP?      |         |
| 3                                            | What is BMI (kg/m <sup>2</sup> )?   |         |
| 4                                            | Delayed treatment                   | Yes     |
|                                              |                                     | No      |
| <b>Part two: Factors associated with POP</b> |                                     |         |
| a) <i>Sociodemographic and economic</i>      |                                     |         |
| 5                                            | What is your age?                   |         |
| 6                                            | What is your ethnicity?             | Gurage  |
|                                              |                                     | Amhara  |
|                                              |                                     | Kambata |
|                                              |                                     | Wolaita |
|                                              |                                     | Hadiya  |
|                                              |                                     | Sidama  |
|                                              |                                     | Oromo   |
|                                              |                                     | Gamo    |

|    |                                    |                         |
|----|------------------------------------|-------------------------|
|    |                                    | Others                  |
| 7  | What is your religion?             | Orthodox                |
|    |                                    | Protestants             |
|    |                                    | Muslim                  |
|    |                                    | Others                  |
| 8  | What is your monthly income?       |                         |
| 9  | What is your residency?            | Rural                   |
|    |                                    | Semi-urban              |
|    |                                    | Urban                   |
| 10 | What is your marital status?       | Single                  |
|    |                                    | Married                 |
|    |                                    | Widowed                 |
|    |                                    | Divorced                |
| 11 | What is your educational status?   | No schooling            |
|    |                                    | Primary school          |
|    |                                    | Secondary school        |
|    |                                    | Diploma and above       |
| 12 | What is your occupational status?  | House wife              |
|    |                                    | Farmer                  |
|    |                                    | Other physical work     |
|    |                                    | Professionally employed |
| 13 | What was your age at marriage?     |                         |
| 14 | Do you have family history of POP? | Yes                     |

|                                    |                                                          |                              |
|------------------------------------|----------------------------------------------------------|------------------------------|
|                                    |                                                          | No                           |
| <b><i>b) Obstetric factors</i></b> |                                                          |                              |
| 15                                 | How many times did you give birth (parity)?              |                              |
| 16                                 | What was mode of delivery at last delivery?              | Spontaneous Vaginal delivery |
|                                    |                                                          | Assisted Vaginal delivery    |
|                                    |                                                          | CS delivery                  |
| 17                                 | Where did you give your last birth?                      | Health institution           |
|                                    |                                                          | Home                         |
| 18                                 | Do you have history of home delivery?                    | Yes                          |
|                                    |                                                          | No                           |
| 19                                 | When did you return to work after delivery               | Before 42 days               |
|                                    |                                                          | After 42 days                |
| 20                                 | How long is your delivery interval?                      |                              |
| 21                                 | What is duration of labor at your last delivery?         |                              |
| 22                                 | Do you have history of duration of labor >24 hr?         | Yes                          |
|                                    |                                                          | No                           |
| 23                                 | What was your age at first delivery?                     |                              |
| 24                                 | What was your age at last delivery?                      |                              |
| 25                                 | Do you have history of Sphincter damage/<br>Vaginal tear | Yes                          |
|                                    |                                                          | No                           |
| 26                                 |                                                          | Yes                          |

|                                                                  |                                                         |     |
|------------------------------------------------------------------|---------------------------------------------------------|-----|
|                                                                  | Do you have history of instrumental delivery?           | No  |
| <b><i>c) Factors that increase intra-abdominal pressures</i></b> |                                                         |     |
| 27                                                               | Do you have history of chronic cough(> 3 wk)?           | Yes |
|                                                                  |                                                         | No  |
| 28                                                               | Do you have history of chronic constipation(>3 months)? | Yes |
|                                                                  |                                                         | No  |
| 29                                                               | Do you carry heavy objects?                             | Yes |
|                                                                  |                                                         | No  |

**Reason that hinder early treatments**

|                                          |                                             |     |
|------------------------------------------|---------------------------------------------|-----|
| 30                                       | How long is the onset of prolapse?          |     |
| <b>Why did you delay for treatments?</b> |                                             |     |
| 31                                       | Because of you Lack of support?             | Yes |
|                                          |                                             | No  |
| 32                                       | Low Income?                                 | Yes |
|                                          |                                             | No  |
| 33                                       | Because lack of transportation?             | Yes |
|                                          |                                             | No  |
| 34                                       | Because unavailability of treatment center? | Yes |
|                                          |                                             | No  |
| 35                                       | Because do you Believe it as normal?        | Yes |

|    |                                                  |     |
|----|--------------------------------------------------|-----|
|    |                                                  | No  |
| 36 | Because Fearing surgery?                         | Yes |
|    |                                                  | No  |
| 37 | Because of Culture?                              | Yes |
|    |                                                  | No  |
| 38 | Because of Afraid of losing social value/stigma? | Yes |
|    |                                                  | No  |
| 39 | Because of Fear of disclosure?                   | Yes |
|    |                                                  | No  |
| 40 | Because of busy?                                 | Yes |
|    |                                                  | No  |

Thank you for your participation!!!

### **S3 File: Amharic version collection checklist**

**ክፍል አራት፡ ቃለ-መጠይቅ (በአማርኛ)**

**በጥናቱ ዙሪያ አጠቃላይ መረጃ ለመስጠትና ስምምነት ለመውሰድ የተዘጋጀ ቅጽ**

በጎንደር ዩኒቨርሲቲ ጤና ሳይንስ ኮሌጅ በሰውነት አካላት ጥናት ትምህርት ክፍል መርሃ ግብር

**የተከበሩ የጥናቱ ተሳታፊ!**

በቅድሚያ እንደ ምን አደራቸው/ዋላቸው?! እኔ-----እባላለሁ።

በአሁኑ ሰዓት በጎንደር ዩኒቨርሲቲ በህክምናና ጤና ሳይንስ ኮሌጅ በሰውነት አካላት ጥናት ትምህርት ክፍል

መርሃ ግብር የማስተርስ/ሁለተኛ ድግሪ ተመራቂ ተማሪ የሆኑት **አቶ አስፋው ቦርሳሞ** በደቡብ ክልል ባሉ ሆስፒታሎች የእናቶች መውለጃ ብልቶች ወደ ውጭ እንዲወጡ የሚያደርጉት ምክንያቶችን ምን እንደሆኑና እንዲሁም በጊዜ እንዳይታከሙ በሚከለክሉአቸው ምክንያቶች ላይ ጥናት እንዲያደርግ ዩኒቨርሲቲው ወጭውን በመሸፈን ፈቅዶታል። ለዚህም ይረዳ ዘንድ መረጃ እንድሰበስብለት ከመረጣቸው ባለሙያዎች መካከል እኔ አንዱ ነኝ። ስለሆነም ከመሳተፍዎ በፊት ግን የጥናቱን ጠቅላላ ይዘት እና ዓላማ እንደሚከተለው ለብራራልዎት እወዳለሁ።

**የጥናቱ ዓላማ:-** የዚህ ጥናት ዋና ዓላማ በደቡብ ክልል ባሉ ሆስፒታሎች የእናቶች መውለጃ ብልቶች ወደ ውጭ እንዲወጡ የሚያደርጉት ምክንያቶችን ምን እንደሆኑና እንዲሁም በጊዜ እንዳይታከሙ በሚከለክላቸው ምክንያቶች ምን እንደሆኑ ለማጥናት ነው።

**ከጥናቱ በመሳተፍዎ የሚያገኙት ጥቅም እና ጉዳት**

**ጥቅም:-** በዚህ ጥናት በመሳተፉ ቀጥተኛ የሆነ ገንዘብም ሆነ ሌላ ጥቅም አያገኙም። ነገር ግን የእርስዎ በዚህ ጥናት መሳተፍ የእናቶች መውለጃ ብልቶች ወደ ውጭ እንዲወጡ በሚያደርጉት ምክንያቶችን ምን እንደሆኑና እንዲሁም በጊዜ እንዳይታከሙ በሚከለክላቸው ምክንያቶች ምን እንደሆኑ ለማወቅ ያስችላል። ከዚህ ጥናት ሚገኙ መረጃዎች በዚህ ችግር የሚጠቁ እናቶች ቁጥር ለመቀነስና እንዲሁም ተጠቂዎችን በጊዜ ህክምና እንዲያገኙ፤ መንግስት ችግሩን ዘላቂ ባለው መንገድ እስቲራቴጂ ነድፎ እንድሰራ ለማድረግ ወሳኝነት አለው። በተጨማሪም ፣ ከዚህ ጥናት የሚገኙ መረጃዎች ችግሩን ለመግታት የሚመለከታቸውና ፍላጎት ያላቸው ግለሰቦችና ድርጅቶች እንድረባረቡ ያነሳሳል።

**ጉዳት:-** በመጀመሪያ ጥናት የሚያካሂደው አካል ጥናቱን ለማካሄድ ከጎንደር ዩኒቨርሲቲ ህጋዊ ፍቃድ የተሰጠው ሲሆን የደቡብ ክልል ጤና ቢሮ ጥናቱን እንድሰራ ፈቅዶውለታል። ከዚህ በተጨማሪ ጥናቱ

የሚካሄደው በቃለ መጠይቅ ነው። በአጠቃላይ ከጥናቱ በመሰተፍም ባለመሰተፍም በእስዎና በቤተሰብዎት ላይ የሚመጣው ምንም አይነት ችግር ወይም ጉዳት የለም፤ ቢበዛ 20 ደቂቃ ከመስጠት በሰተቀረ።

**ሙብትን በተመለከተ፡** ጥናቱ በፍቃደኝነት ላይ የተመሰረተ ስለሆነ በጥናቱ ውስጥ የመሰተፍም ያለመሰተፍም እንዲሁም የጥናቱ መጠይቅ ካልተመቸዎት በፈለጉት ጊዜ የማቋረጥ ሙብት አለዎት።

**ሚስጢር መጠበቅን በተመለከተ፡** የእርስዎ ስም በመጠይቁ ወረቀት ላይ አይፃፍም። የሚትሠጡን መረጃ በምንም መልኩ ለሶስተኛ ወገን አይታይም።

ስለጥናቱ ማንኛውም ዓይነት ጥያቄ ቢኖርዎት ወይም ስለጥናቱ የመጨረሻ ውጤት ማወቅ ቢያስፈልግዎት በሚከተለው የዋናው ተመራማሪ አድራሻ ማግኘት ይችላሉ።

**የተመራማሪዎች አድራሻ፡-**

1. አስፋው በርሳሞ፡ ዋና ተመራማሪ ስልክ፡ 0984867398፣ ኢሜይል [aseborsa@gmail.com](mailto:aseborsa@gmail.com)
2. ያሬድ አስማረ-----በጎንደር ዩንቨርስቲ የተመራማሪው አማካሪ
3. አያናው ወርቁ-----በጎንደር ዩንቨርስቲ የተመራማሪው ረዳት አማካሪ
4. ሞሃመድ ኡመር----በጎንደር ዩንቨርስቲ የተመራማሪው ረዳት አማካሪ

በአጠቃላይ በጥናቱ ዙሪያ በተደረገለዎት ገለጻ ተስማምተውና አምነውብት ከሆነ በጥያቄው ለመሰተፍ ፍቃደኛ ናት?

1. **አዎ**-----ጥያቄውን ይቀጥሉ
2. **አይደለውም**-----ስለነበረን ቆይታ አመሰግናለው በማለት ጥያቄውን ያቋርጡ



**የስምምነት ቅጽ ለወላጅ**

እኔ ከዚህ በታች የፈረምኩት ግለሰብ በደቡብ ክልል ባሉ ሆስፒታሎች የእናቶች መውለጃ ብልቶች ወደ ውጭ እንዲወጡ የሚያደርጉት ምክንያቶችን ምን እንደሆኑና እንዲሁም በጊዜ እንዳይታከሙ በሚከለክሉአቸው ምክንያቶችን ለማወቅ በሚደረገው ጥናት ያለውን ጥቅምና ጉዳት በመረዳት በፈቃደኝነት ላይ የተሳተፍኩ ሲሆን ከዚህ ቀጥሎ በሚገኘው መጠይቅ የምሰጠው መረጃም ሚስጢርነቱ የተጠበቀ እንደሚሆንና መጠይቁ ካልተመቸኝ በፈለኩት ስዓት የማቋረጥ መብት እንዳለኝ በሚገባ ተነግሮኛል። በጥናቱ ውስጥ ተሳታፊ መሆኔም አለመሆኔም በግል ሕይወቴ ውስጥ ችግር እንደማያመጣብኝም ተነግሮኛል። በመጨረሻም ስለ ጥናቱ እና የጥናቱ ተሳታፊ እንደመሆኔ ባለኝ መብት ዙሪያ ጥያቄ ቢኖረኝ አቶ አስፋው በርሣሞ የተባለውን የጥናቱ ዋና ባለቤት ማናገር አንደምቸልም ተረድቻለሁ።

የመረጃ ሰጪው መለያ ኮድ----- ፊርማ-----ቀን-----

የመረጃ ሰብሳቢው ፊርማ-----ቀን-----

**ቃለ-መጠይቅ**

በደቡብ ክልል ባሉ ሆስፒታሎች የእናቶች መውለጃ ብልቶች ወደ ውጭ እንዲወጡ የሚያደርጉት ምክንያቶችን ምን እንደሆኑና እንዲሁም በጊዜ እንዳይታከሙ በሚከለክሉአቸው ምክንያቶችን ለማወቅ የሚደረግ ጥናት

Ref. No \_\_\_\_\_

|      |                                      |    |
|------|--------------------------------------|----|
| S.No | <b>ክፍል አንድ: በባለ-ሙያ ታይቶ የተገኙ ግኝቶች</b> |    |
| 1    |                                      | አዎ |

|                                         |                                                               |       |
|-----------------------------------------|---------------------------------------------------------------|-------|
|                                         | የመውለጃ ብልቶች እየተሰቡ ወደ ውጭ ይወጣሉን?                                 | አይደለም |
| 2                                       | የህመሙ ደረጃ ምን ያክል ነው?                                           |       |
| 3                                       | መጠነ-ውፈረት ምን ያክል ነው (kg/m <sup>2</sup> ) (kg/m <sup>2</sup> )? |       |
| 4                                       | ለህክምና ዘገይተዋል?                                                 | አዎ    |
|                                         |                                                               | አይደለም |
| <b>ክፍል ሁለት: ህመሙ እንዲፈጠር የሚደርጉ ምክንያቶች</b> |                                                               |       |
| <b>ሀ. ማህበራዊ መስተጋብር ምክንያቶች</b>           |                                                               |       |
| 5                                       | ዕድሜዎ ስንት ነው?                                                  |       |
| 6                                       | ዘርዎት ምንድነው?                                                   | ጉራጌ   |
|                                         |                                                               | አማራ   |
|                                         |                                                               | ከንባታ  |
|                                         |                                                               | ወላይታ  |
|                                         |                                                               | ሀድያ   |
|                                         |                                                               | ሲዳማ   |
|                                         |                                                               | አሮሞ   |
|                                         |                                                               | ጋሞ    |
| ሌሎችም                                    |                                                               |       |

|    |                   |                |
|----|-------------------|----------------|
| 7  | ኃይማኖት ምንድነው?      | አርቶዶክስ         |
|    |                   | ፕሮተስታንት        |
|    |                   | ሙስሊም           |
|    |                   | ሌሎችም           |
| 8  | ወርድ ገብዎት ስንት ነው?  |                |
| 9  | መኖሪያውት ዬት ነው?     | ገጠር            |
|    |                   | በከፊል ከተማ       |
|    |                   | ከተማ            |
| 10 | የጋብቻዎት ሁኔታስ?      | ያላገባች          |
|    |                   | ያገባች           |
|    |                   | ባል የሞተባት       |
|    |                   | የፈታች           |
| 11 | የት/ት ደረጃዎት ምንድነው? | ምንም አልተማረኩም    |
|    |                   | ከ 1-8 ተምሬያለሁ   |
|    |                   | ከ 9-12 ተምሬያለሁ  |
|    |                   | ዲፕሎማ እና ከዛ በላይ |
| 12 | ስራዎት ምንድነው?       | የቤት እመቤት       |
|    |                   | ገበሬ            |
|    |                   | ሌላ የጉልበት ስራ    |

|                                |                                  |                         |
|--------------------------------|----------------------------------|-------------------------|
|                                |                                  | በመንግስትና ድርጅት ቅጥር        |
| 13                             | ስያገቡ ዕድሜዎት ስንት ነበረ?              |                         |
| 14                             | በቅርብ ዘመድዎት እንደዚህ ዓይነት            | አዎ                      |
|                                | ህመም አለ ወይ?                       | አይደለም                   |
| <b>ላ. ከወሊድ ጋራ የቴያያዙ ምክንያቶች</b> |                                  |                         |
| 15                             | ስንት ጊዜ ወልደዋል?                    |                         |
| 16                             | ለመጨረሻ ጊዜ እንዴት ነበር የወለዱት?         | ያለምንም ችግር በማህፀን በር በኩል  |
|                                |                                  | በባለሙያች እገዛ በማህፀን በር በኩል |
|                                |                                  | በቀዶ-ጥገና                 |
| 17                             | ለመጨረሻ ጊዜ ስወልዱ ዬት                 | በጤና ተቀዋም                |
|                                | ነበረ የወለዱት?                       | ቤት                      |
| 18                             | ቤት ወልደው ያውቃሉ?                    | አዎ                      |
|                                |                                  | አይደለም                   |
| 19                             | ከወሊዱ በኋላ ምን ያክል ቆይተው ስራ          | 42 ቀን በፊት               |
|                                | ይጀምራሉ?                           | 42 ቀን በኋላ               |
| 20                             | ልጆቻችን ምን ያክል አራርቀው ይወልዳሉ?        |                         |
| 21                             | ለመጨረሻ ጊዜ ስወልዱ ምጡ ምን ያክል ቆይቶ ነበር? |                         |
| 22                             |                                  | አዎ                      |

|                                     |                                             |       |
|-------------------------------------|---------------------------------------------|-------|
|                                     | ምጥ ከ>24 ሰዓት በላይ ቆይቶቦት ያውቃል?                 | አይደለም |
| 23                                  | ለመጀመሪያ ጊዜ ስወልዱ ዕድሜዎት ስንት ነበረ?               |       |
| 24                                  | መጨረሻ ጊዜ ስወልዱ ዕድሜዎት ስንት ነበረ?                 |       |
| 25                                  | ስወልዱ ባለሙያ ውጫኛውን መውለጃ በር ቆርጠው/ ተቀደው ያውቃል?    | አዎ    |
|                                     |                                             | አይደለም |
| 26                                  | ባለሙያ የተለያዩ የማዋለጃ ወይንም ብረት በመጠቀም አዋልዶት ያውቃል? | አዎ    |
|                                     |                                             | አይደለም |
| <b>ሐ. ውስጣዊ የሆድ ግፊት የሚጨምሩ መምክንቶች</b> |                                             |       |
| 27                                  | ከ 3 ሳምንት በልይ የቆዩ ሳል ነበረዎት?                  | አዎ    |
|                                     |                                             | አይደለም |
| 28                                  | ከ 2 ወር በላይ የቆዩ የሆድ ድርቀት ነበረዎት?              | አዎ    |
|                                     |                                             | አይደለም |
| 29                                  | ከበድ ያለ ዕቃ ይሸከማሉ?                            | አዎ    |
|                                     |                                             | አይደለም |

**ተጠቂዎቹ ዘግይተው ለህክምና እንዲመጡ የሚያደርጉ ምክንያቶች**

|    |                               |       |
|----|-------------------------------|-------|
| 30 | ህመሙ ከጀመሮት ስንት ጊዜ ሆነ?          |       |
|    | <b>ለመታከም ለምን ቶሎ አልመጣሽም?</b>   |       |
| 31 | የሚደግፎትን አጥተው?                 | አዎ    |
|    |                               | አይደለም |
| 32 | ገንዘብ በመጣት?                    | አዎ    |
|    |                               | አይደለም |
| 33 | ትራንስፖርት በማጣት?                 | አዎ    |
|    |                               | አይደለም |
| 34 | ህክምና የሚሰጡ ቦታዎች ስለራቁ?          | አዎ    |
|    |                               | አይደለም |
| 35 | ህመሙ በሴቶች ስለምከሰት ችግር የለውም ብለው? | አዎ    |
|    |                               | አይደለም |
| 36 | ቀዶ ጥገና ስለምፈሩ?                 | አዎ    |
|    |                               | አይደለም |
| 37 | በባህላችን አይፈቅድም?                | አዎ    |
|    |                               | አይደለም |
| 38 | ሰዎች ያገሉኛል/ይሸኹኛል ብለው ስለፈሩ?     | አዎ    |
|    |                               | አይደለም |
| 39 | ችግሮችን መግለጥ ስለፈሩ?              | አዎ    |

|    |                      |       |
|----|----------------------|-------|
|    |                      | አይደለም |
| 40 | ስራ ስለምበዛቦት ጊዜ ስላላገኙ? | አዎ    |
|    |                      | አይደለም |
